# Supplementary material
Source: publisher figshare collection journal article supplement (https://acs.figshare.com/ndownloader/files/12532859)
Supplement: Supplementary file 1 [file 12532859]

## Supporting Information

# Dual-mode fluorescence and magnetic resonance imaging nanoprobe based on aromatic amphiphilic copolymer encapsulated CdSe@CdS and Fe<sub>3</sub>O<sub>4</sub>

*Xiaohong He, † Xue Shen, ‡ Dongming Li, † Yiyao Liu, ‡ Kun Jia\*, † Xiaobo Liu\*†*

† Research Branch of Advanced Functional Materials, School of Materials and Energy, University of Electronic Science and Technology of China, Chengdu, 611731, P.R. China

‡ Department of Biophysics, School of Life Science and Technology, University of Electronic Science and Technology of China, Chengdu, 610054, P.R. China

---

Corresponding authors: Kun Jia ([jiakun@uestc.edu.cn](mailto:jiakun@uestc.edu.cn)), Xiaobo Liu ([liuxb@uestc.edu.cn](mailto:liuxb@uestc.edu.cn))

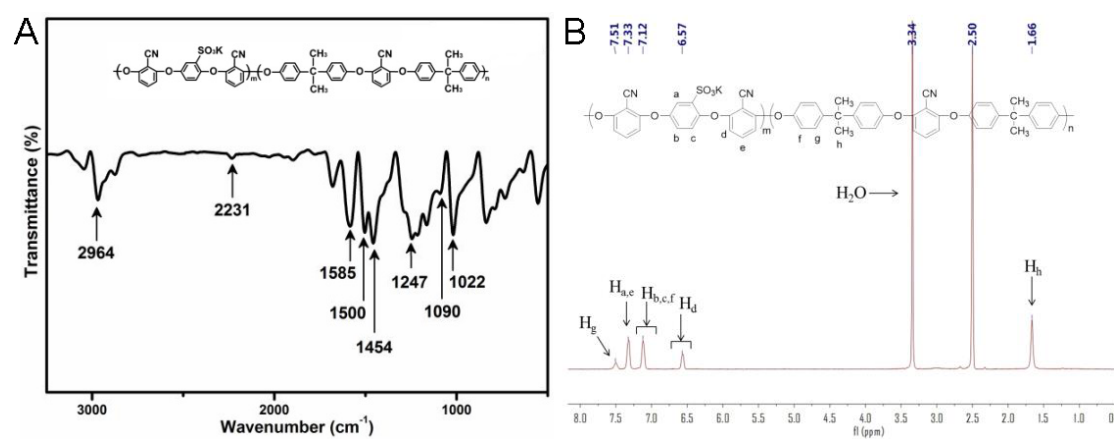

**Figure S1.** The FTIR spectrum (A) and the <sup>1</sup>H NMR spectrum (B) of the synthesized amphiphilic polyarylene ether nitrile.

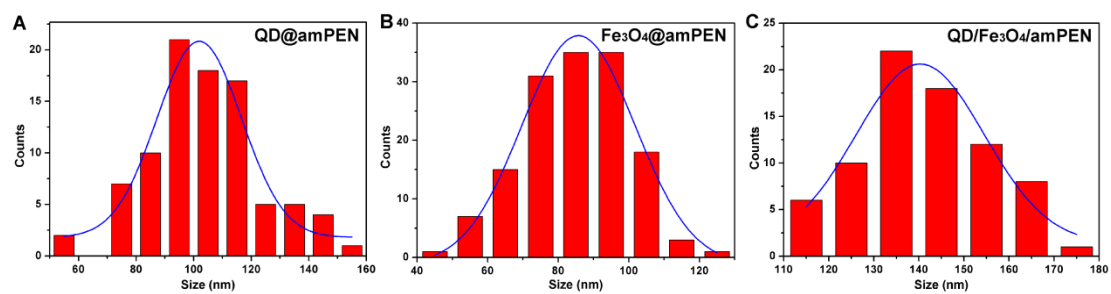

Figure S2. The size distribution histograms of the prepared QD@amPEN (A), Fe<sub>3</sub>O<sub>4</sub>@PEN (B) and QD/Fe<sub>3</sub>O<sub>4</sub>/amPEN (C) nanospheres.

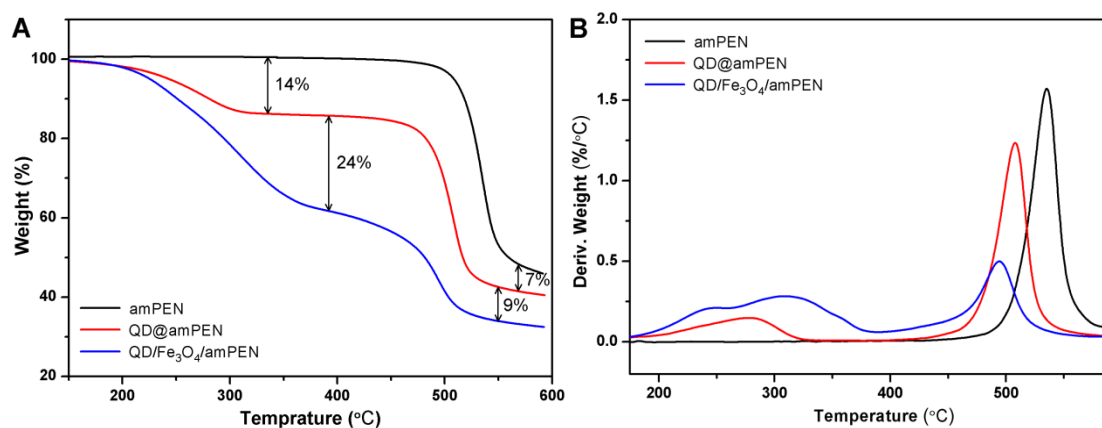

Figure S3. The TGA curves (A) and corresponding differential TGA curves (B) of the synthesized amPEN, QD@amPEN as well as QD/Fe<sub>3</sub>O<sub>4</sub>/amPEN nanospheres.

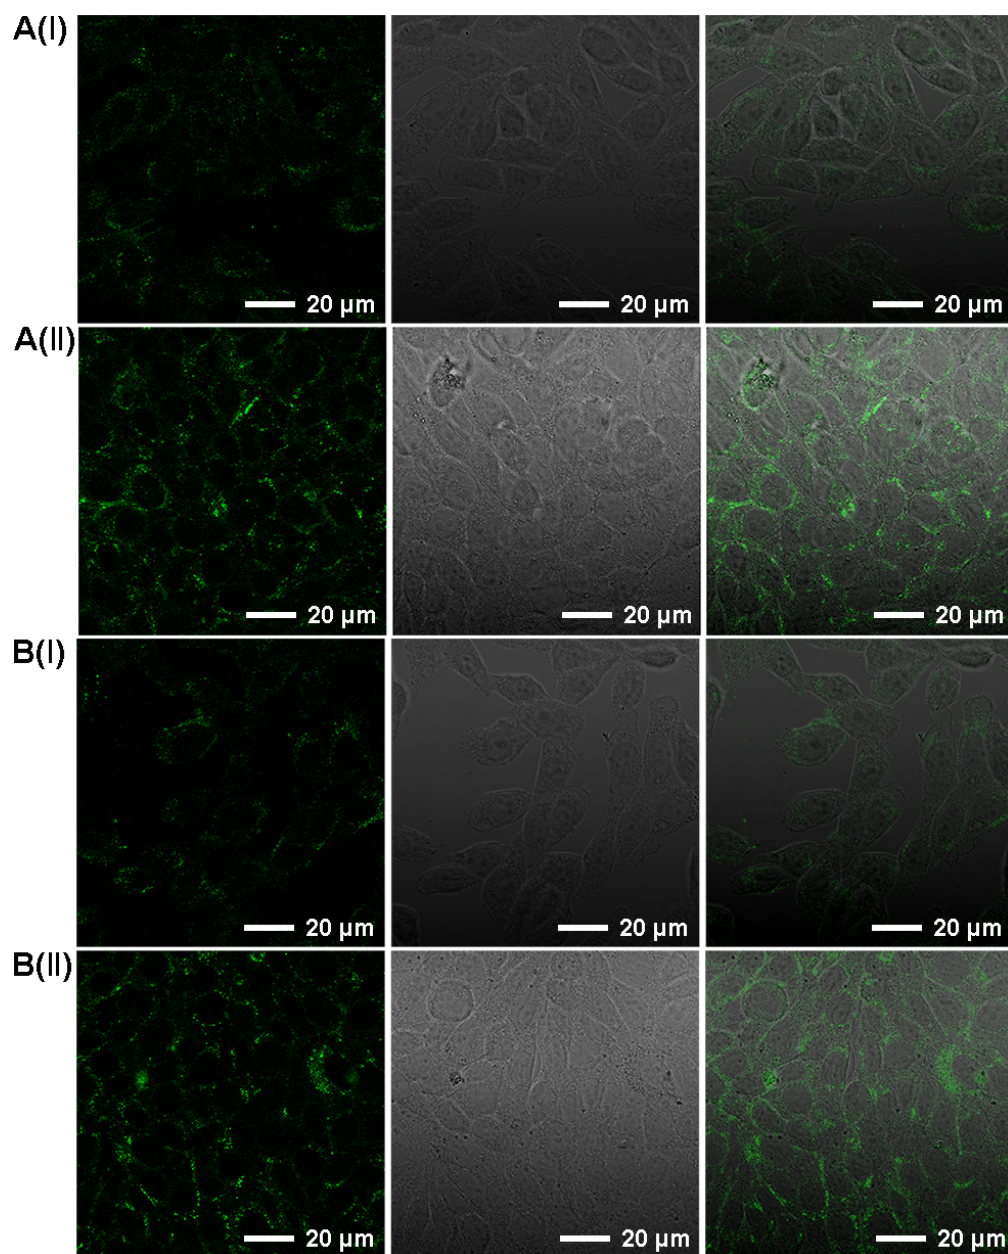

Figure S4. The confocal images of EMT6 cells labeled with QD@amPEN (A) and QD/Fe<sub>3</sub>O<sub>4</sub>/amPEN (B) nanospheres at a concentration of 60 μg/mL and incubated for 3 h (I) and 12 h (II) under green channel, bright field, and merged images, respectively.
